# Supplementary material for: Process parameters and changes in the microbial community patterns during the first 240 days of an agricultural energy crop digester
Source: PubMed Central journal article supplement (PMC4970986; doi:10.1186/s13568-016-0219-7), 2016-08-02
Supplement: 13568_2016_219_MOESM1_ESM.pdf [file 13568_2016_219_MOESM1_ESM.pdf]

**Process Parameters and changes in the microbial community patterns during the first 240 days of an agricultural energy crop digester**

AMB Express

Authors: N. Weithmann, A. Weig, R. Freitag\*

\* corresponding author

Process Biotechnology, Center for Energy Technology, University of Bayreuth,  
95440 Bayreuth, Germany

ruth.freitag@uni-bayreuth.de, Tel.: +49 921 557371
